# Supplementary material for: Performance of quantitative measurements in [18F]fluorocholine positron emission tomography/computed tomography for parathyroid imaging (P2TH study)
Source: PubMed Central journal article supplement (PMC9380568; doi:10.3389/fmed.2022.956580), 2022-08-02

# ROC Curves v2

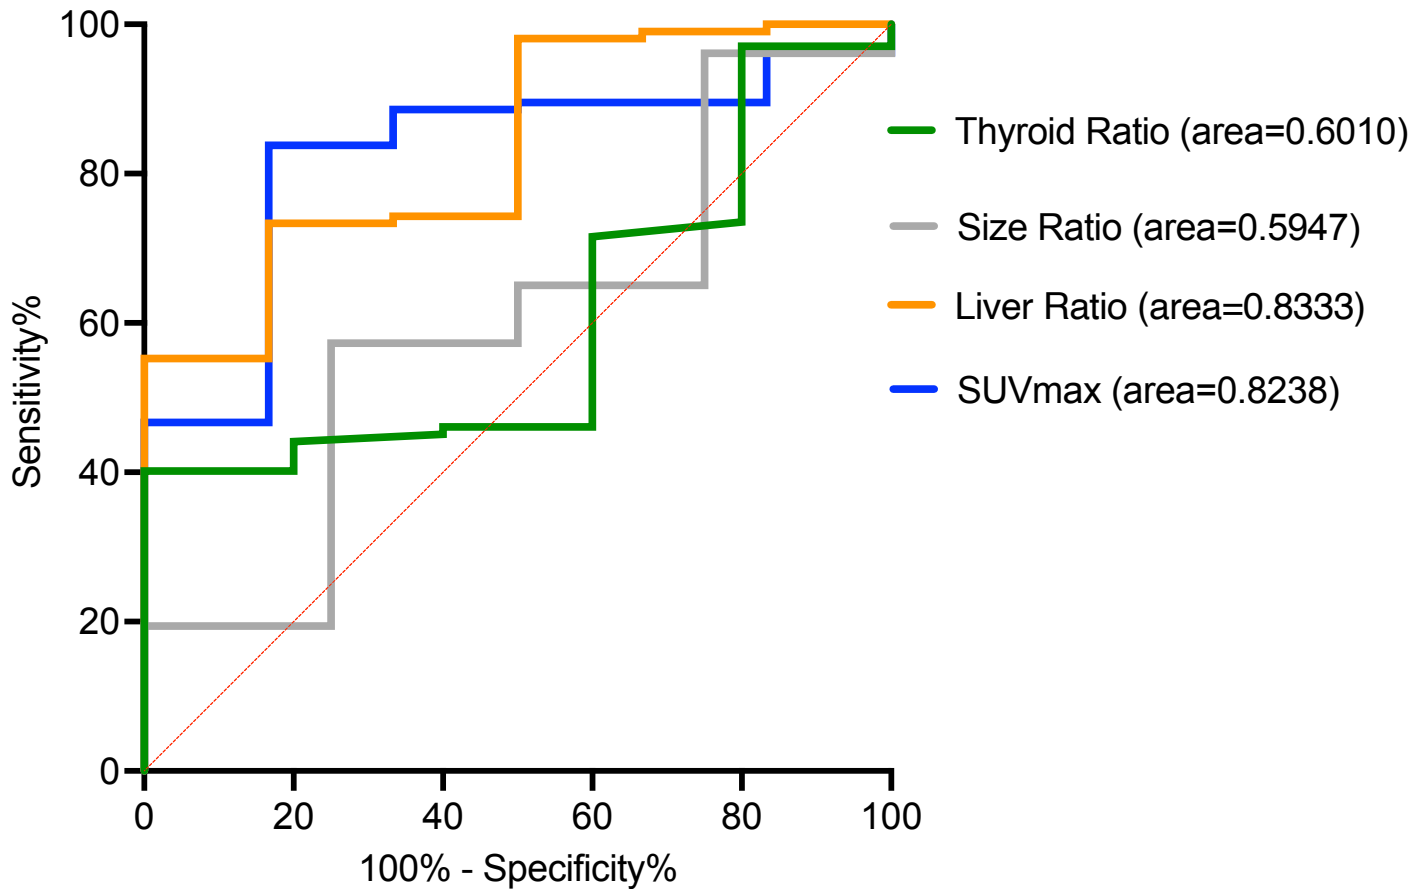

Supplement: Image_1.pdf [file Image_1.pdf]
